# Supplementary material for: Synthesis and photo- and electro-luminescent properties of Ir(iii) complexes attached to polyhedral oligomeric silsesquioxane materials
Source: Royal Society of Chemistry journal article supplement (doi:10.1039/c5ra16201g), 2015-01-01
Supplement: c5ra16201g1.pdf [file c5ra16201g1.pdf]

**Supplementary materials:**

**Synthesis and Photo- and Electro-luminescent Properties of Ir(III)  
Complexes Attached Polyhedral Oligomeric Silsesquioxane  
Materials**

**Tianzhi Yu<sup>1,\*</sup>, Xin Wang<sup>1</sup>, Wenming Su<sup>2,\*</sup>, Chengcheng Zhang<sup>1</sup>, Yuling Zhao<sup>3</sup>, Hui Zhang<sup>1</sup>,**

**Zixuan Xu<sup>1</sup>**

<sup>1</sup>Key Laboratory of Opto-Electronic Technology and Intelligent Control (Ministry of Education),  
Lanzhou Jiaotong University, Lanzhou 730070, China

<sup>2</sup>Printable electronics research center, Suzhou Institute of Nano-Tech and Nano-Bionics, Chinese  
Academy of Sciences, Suzhou 215123, China

<sup>3</sup>School of Chemical and Biological Engineering, Lanzhou Jiaotong University, Lanzhou 730070,  
China

---

\* Corresponding Author. Tel. +86-931-4956935; Fax: +86-931-4938756; e-mail: yutianzhi@hotmail.com (T.Z. Yu); wmsu2008@sinano.ac.cn (W.M. Su).

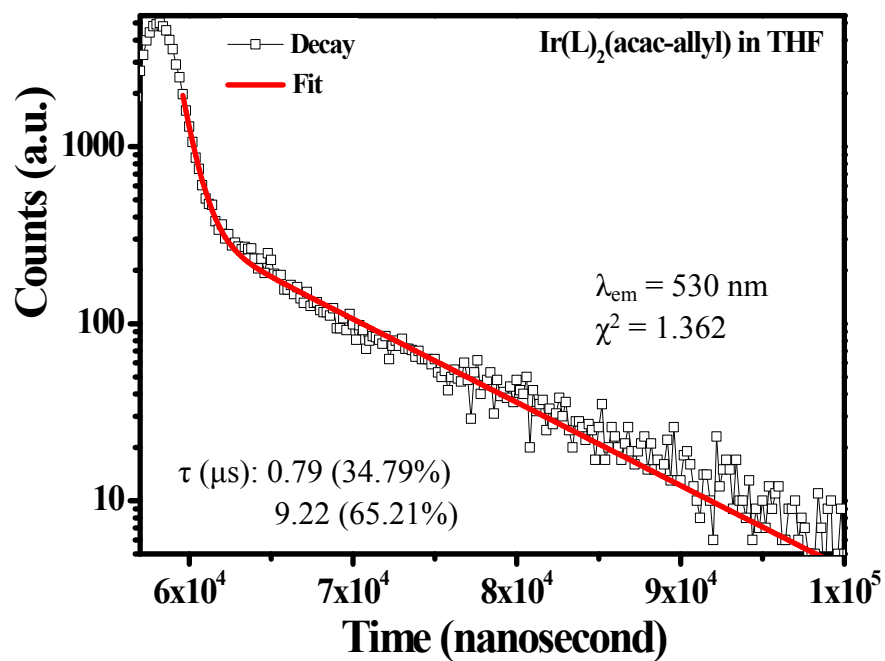

Fig. S1. Photoluminescence decay lifetime of Ir(L)<sub>2</sub>(acac-allyl) in THF solution at room temperature.

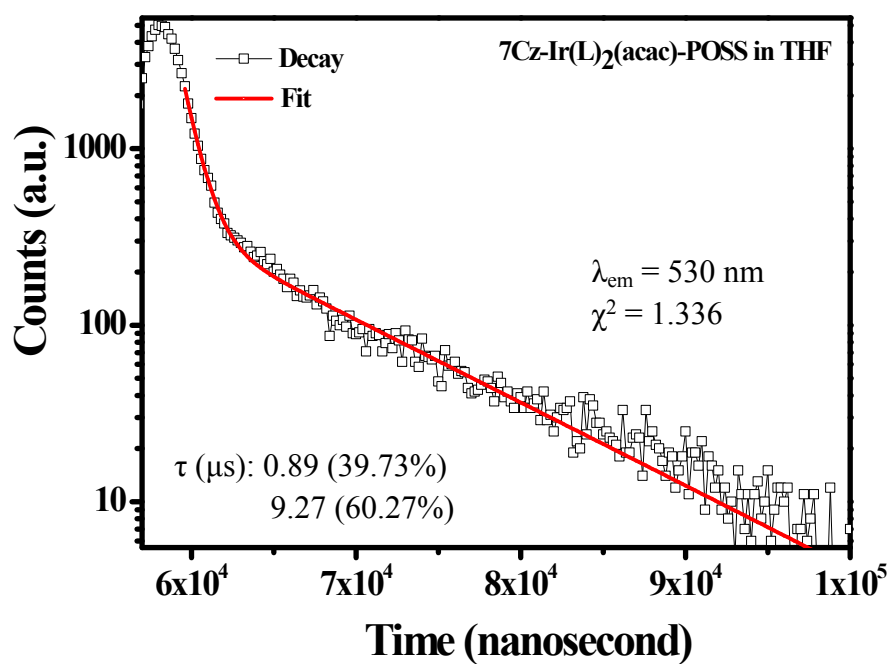

Fig. S2. Photoluminescence decay lifetime of 7Cz-Ir(L)<sub>2</sub>(acac)-POSS in THF solution at room temperature.

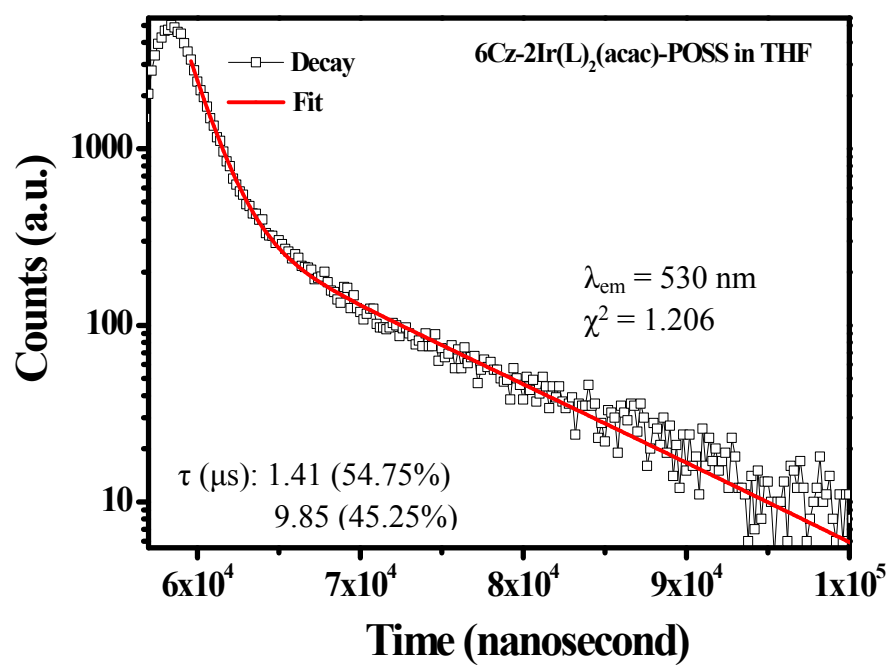

Fig. S3. Photoluminescence decay lifetime of 6Cz-2Ir(L)<sub>2</sub>(acac)-POSS in THF solution at room temperature.
